# Supplementary material for: Associations between health-related quality of life, cardiorespiratory fitness, muscle strength, physical activity and waist circumference in 10-year-old children: the ASK study
Source: Springer Nature journal article supplement (doi:10.1007/s11136-017-1634-1), 2017-06-27
Supplement: MOESM1 [file 12482364]

**Online appendix to: Associations between health-related quality of life, cardiorespiratory fitness, muscle strength, physical activity and waist circumference in 10-year old children: The ASK study**

*Sensitivity analysis based on multiple imputation*

Assuming the data were missing at random, a Markov Chain Monte Carlo procedure with 20 iterations that included all the covariates, independent –and dependent variables included in the regression models was conducted (see table S1 for script). The number of imputed data equals the number of the missing data presented in table 1 in the paper. The results are presented in Table S2.

Table S1. SPSS script for the multiple imputation procedure

| DATASET ACTIVATE DataSet2.  *Impute Missing Data Values  DATASET DECLARE New_dataset  MULTIPLE IMPUTATION [all variables in table 1]  /IMPUTE METHOD=FCS MAXITER= 10 NIMPUTATIONS=20 SCALEMODEL=LINEAR INTERACTIONS=NONE  SINGULAR=1E-012 MAXPCTMISSING=NONE  /MISSINGSUMMARIES NONE  /IMPUTATIONSUMMARIES MODELS  /OUTFILE IMPUTATIONS=New_dataset |
| --- |

**Table S2. Sensitivity analysis based on multiple imputation: Linear mixed effect analysis with Kidscreen-27 scores as the dependent variables (N = 1129)**

| Variables | Estimate per 1 SD (95% CI) | P-value |
| --- | --- | --- |
| *Physical Wellbeing* |  |  |
| Cardiorespiratory fitness | 2.30 (1.50, 3.10) | <0.001 |
| Hand grip strength | 0.16 (-0.60, 0.91) | 0.685 |
| Explosive strength in the lower body | 1.03 (0.24, 1.81) | 0.010 |
| Physical activity | 0.93 (0.28, 1.59) | 0.005 |
| Abdominal adiposity | -0.45 (-1.23, 0.34) | 0.264 |
|  |  |  |
| *Psychological Wellbeing* |  |  |
| Cardiorespiratory fitness | 1.60 (0.78, 2.42) | <0.001 |
| Hand grip strength | 0.53 (-0.20, 1.26) | 0.156 |
| Explosive strength in the lower body | -0.03 (-0.77, 0.71) | 0.941 |
| Physical activity | -0.17 (-0.84, 0.50) | 0.616 |
| Abdominal adiposity | -0.51 (-1.31, 0.29) | 0.212 |
|  |  |  |
| *Autonomy and Parents* |  |  |
| Cardiorespiratory fitness | 1.35 (0.53, 2.17) | 0.001 |
| Hand grip strength | -0.13 (-0.92, 0.66) | 0.742 |
| Explosive strength in the lower body | 0.90 (0.08, 1.71) | 0.031 |
| Physical activity | 0.15 (-0.53, 0.84) | 0.664 |
| Abdominal adiposity | 0.56 (-0.28, 1.40) | 0.188 |
|  |  |  |
| *Social Support and Peers* |  |  |
| Cardiorespiratory fitness | 1.00 (0.18, 1.82) | 0.017 |
| Hand grip strength | -0.52 (-1.32, 0.27) | 0.194 |
| Explosive strength in the lower body | 0.90 (0.11, 1.70) | 0.026 |
| Physical activity | 0.38 (-0.26, 1.03) | 0.245 |
| Abdominal adiposity | -0.04 (-0.79, 0.86) | 0.928 |
|  |  |  |
| *School Environment* |  |  |
| Cardiorespiratory fitness | 0.92 (0.09, 1.75) | 0.030 |
| Hand grip strength | -0.16 (-0.95, 0.64) | 0.700 |
| Explosive strength in the lower body | 0.43 (-0.40, 1.27) | 0.311 |
| Physical activity | 0.27 (-0.40, 0.94) | 0.437 |
| Abdominal adiposity | 0.30 (-0.50, 1.09) | 0.465 |

Note. The independent variables are standardised, so they reflect estimated change in the dependent variables per 1 standard deviation (SD) change in the independent variable. The estimates are adjusted for school site, age, sex, and the other variables included in the table.
